# Supplementary material for: All2: A tool for selecting mosaic mutations from comprehensive multi-cell comparisons
Source: PubMed Central journal article supplement (PMC9060341; doi:10.1371/journal.pcbi.1009487), 2022-04-20

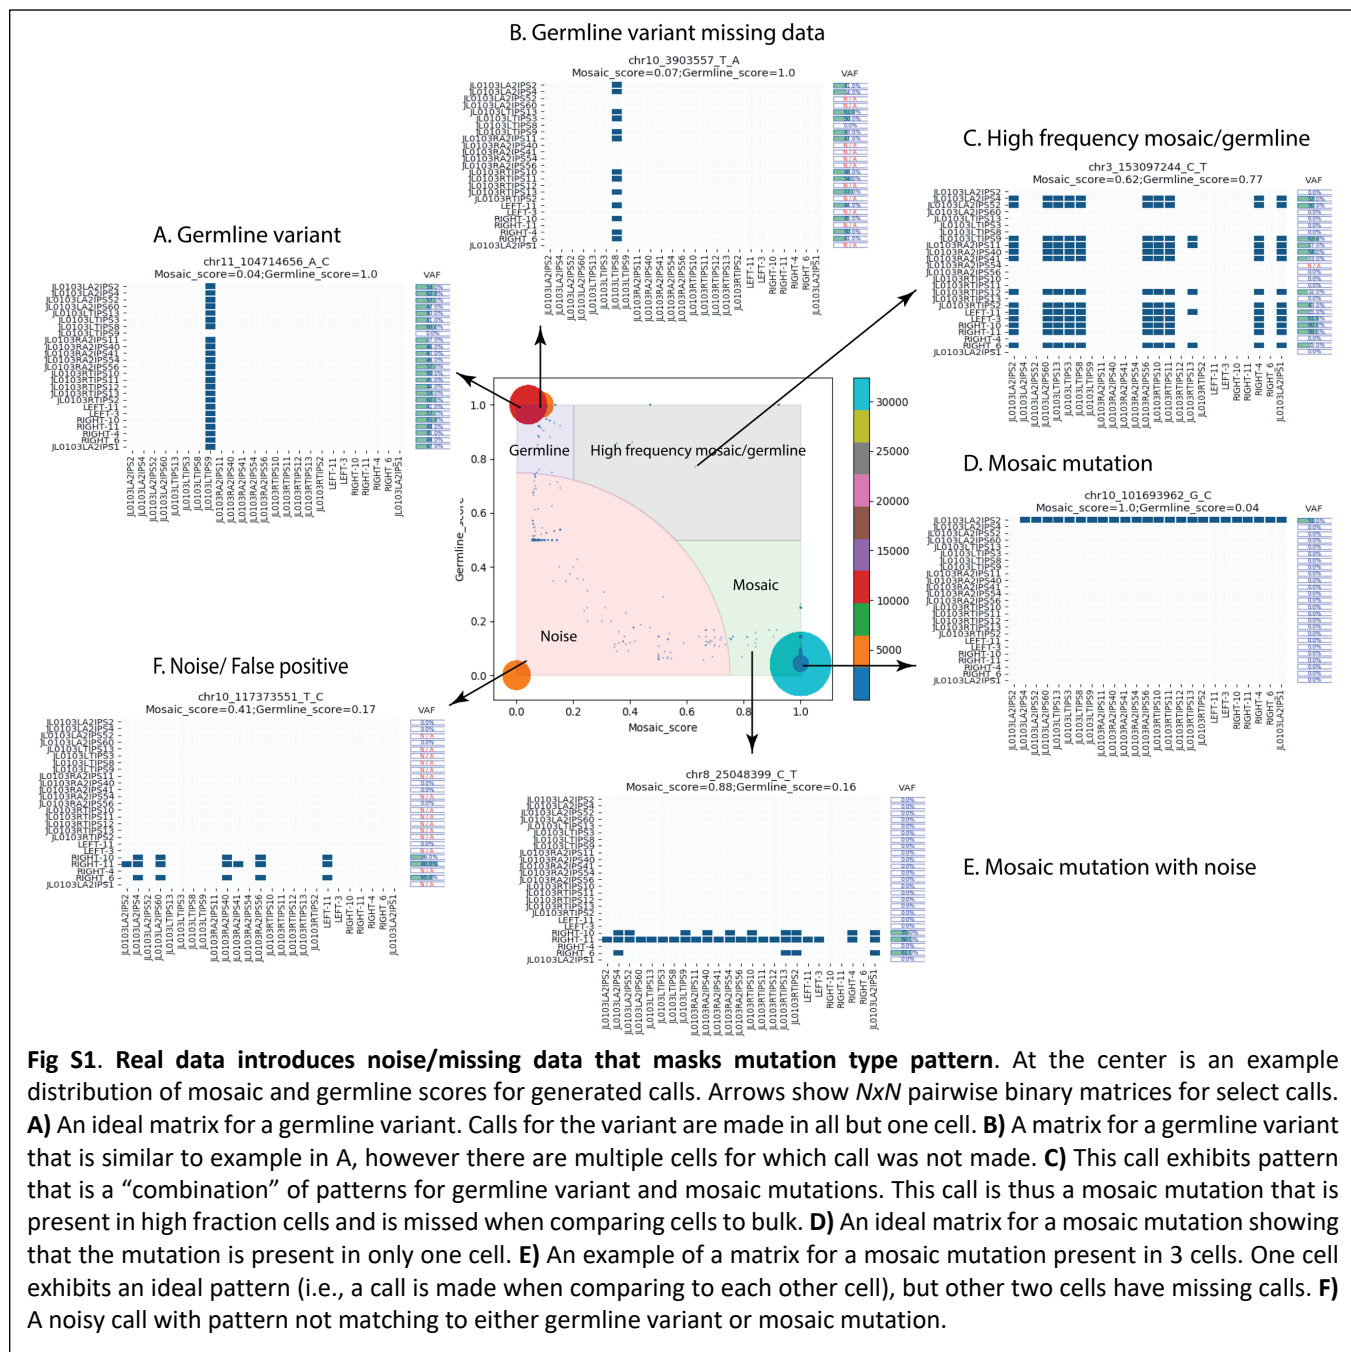

Supplement: pcbi.1009487.s001.pdf [file pcbi.1009487.s001.pdf]
