# Supplementary material for: All2: A tool for selecting mosaic mutations from comprehensive multi-cell comparisons
Source: PubMed Central journal article supplement (PMC9060341; doi:10.1371/journal.pcbi.1009487), 2022-04-20
Supplement: pcbi.1009487.s007.pdf [file pcbi.1009487.s007.pdf]

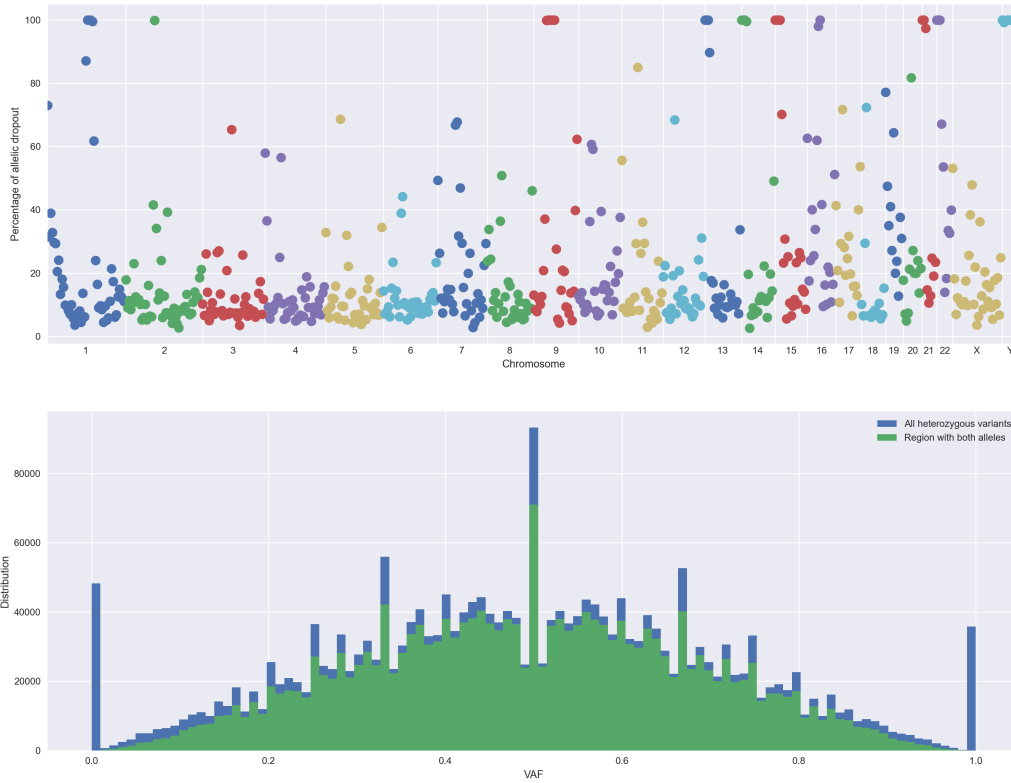

**Fig S7. Regions with allelic dropout for single cell.** Upper panel: cross genome percentage of 5 Mbp bins marked as allele drop-outs. Bottom panel: the distribution of allele frequency for heterozygous variants in all and non alle drop-outs bins.
