# Supplementary material for: All2: A tool for selecting mosaic mutations from comprehensive multi-cell comparisons
Source: PubMed Central journal article supplement (PMC9060341; doi:10.1371/journal.pcbi.1009487), 2022-04-20
Supplement: pcbi.1009487.s008.pdf [file pcbi.1009487.s008.pdf]

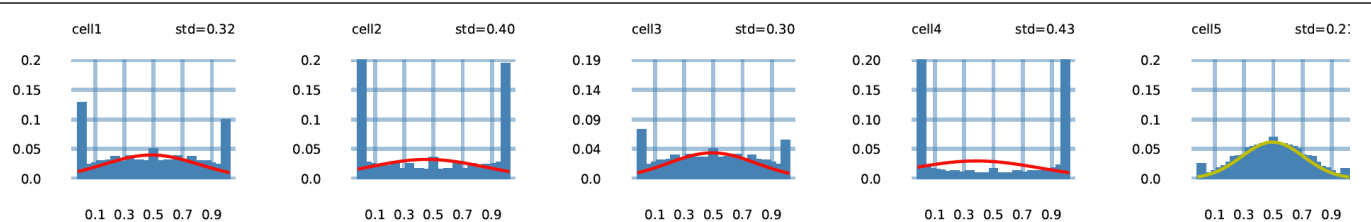

**Fig S8. Allele frequency distribution of heterozygous germline variants in 5 MDA-amplified cells. Cell5 was selected for further analysis owing to its most uniform amplification and lower allele drop out as compared to the other cells.**
