# Supplementary material for: All2: A tool for selecting mosaic mutations from comprehensive multi-cell comparisons
Source: PubMed Central journal article supplement (PMC9060341; doi:10.1371/journal.pcbi.1009487), 2022-04-20
Supplement: pcbi.1009487.s009.pdf [file pcbi.1009487.s009.pdf]

| Samples | Number of SNV in tree | SNVs with coverage > 200X | # of SNVs with VAF >= 4% < 35% | # of SNVs with VAF <= 1% | Missed | Missed(As fraction) |
|---------|-----------------------|---------------------------|--------------------------------|--------------------------|--------|---------------------|
| LA1     | 65                    | 50                        | 14                             | 24                       | 12     | 24.00%              |
| LA2     | 65                    | 49                        | 10                             | 15                       | 24     | 48.98%              |
| RA1     | 65                    | 51                        | 0                              | 19                       | 32     | 62.75%              |
| RA2     | 65                    | 51                        | 10                             | 15                       | 26     | 50.98%              |
| LT      | 65                    | 51                        | 22                             | 12                       | 17     | 33.33%              |
| RT      | 65                    | 50                        | 14                             | 21                       | 15     | 30.00%              |
| Blood   | 65                    | 50                        | 16                             | 19                       | 15     | 30.00%              |
| Saliva  | 65                    | 50                        | 17                             | 12                       | 21     | 42.00%              |

**Table S1. Fraction of mosaic mutations (SNVs) missed using different tissue types.** From capture sequencing of 65 SNVs from the lineage tree (Figure 2B), we only considered the one with coverage of 200X or higher. SNVs with VAF greater than 4% and less than 35% represents mutations that can be derived from bulk where as SNVs which VAF less than 1% can be derived from bulk to single cell paired comparison. By subtracting the number of SNVs that can be found by bulk analyses and paired analyses from the number of “SNVs with coverage > 200X” we can calculate the fraction of missed SNVs. The column “Missed (As Fraction)” shows that LA1, LT and RT have comparable missed SNVs with blood and saliva, whereas in LA2, RA1 and RA2, half of the SNVs are being missed. These results suggest that using any of the bulk samples does not outperform ALL<sup>2</sup> for lineage tree construction.
